# Supplementary material
Source: publisher figshare collection journal article supplement (https://acs.figshare.com/ndownloader/files/22377642)
Supplement: Supplementary file 1 [file 22377642]

## Supporting Information for

# 3D Bioprinting of carbohydrazide-modified gelatin into microparticle-suspended oxidized alginate for fabrication of complex-shaped tissue constructs

*Dong Nyoung Heo,<sup>a,b,c</sup> Mecit Altan Alioglu,<sup>a,b</sup> Yang Wu,<sup>a,b,d</sup> Veli*

*Ozbolat,<sup>e</sup> Bugra Ayan,<sup>a,b</sup> Madhuri Dey,<sup>b,f</sup> Youngnam Kang,<sup>a,b</sup> Ibrahim*

*T. Ozbolat<sup>\*a,b,g,h,i</sup>*

<sup>a</sup> Department of Engineering Science and Mechanics Department, The Pennsylvania State University, University Park, PA 16802, USA

<sup>b</sup> The Huck Institutes of the Life Sciences, The Pennsylvania State University, University Park, PA 16802, USA

<sup>c</sup> Department of Dental Materials, School of Dentistry, Kyung Hee University, 26 Kyungheedaero-ro, Dongdaemun-gu, Seoul 02447, Republic of Korea

<sup>d</sup> School of Mechanical Engineering and Automation, Harbin Institute of Technology, Shenzhen 518055, China

<sup>e</sup> Department of Mechanical Engineering, Ceyhan Engineering Faculty, Cukurova University, Adana 01950, Turkey

<sup>f</sup> Chemistry Department, Penn State University, University Park, PA 16802, USA

<sup>g</sup> Biomedical Engineering Department, Pennsylvania State University, University Park, PA, 16802, USA

<sup>h</sup> Materials Research Institute, Pennsylvania State University, University Park, PA, 16802, USA

<sup>i</sup> Neurosurgery Department, College of Medicine, Pennsylvania State University, Hershey, PA, 17033, USA

**\* Correspondence author**

E-mail: itol1@psu.edu (Ibrahim T. Ozbolat). Tel.: 1-814-863-5819



## **Video Captions:**

**Video S1: Mixing and casting of OAlg and Gel-CDH hydrogels into 3D printed PDMS molds for fabrication of samples for the compression test.** A5G5, A4G6, A3G7 and A2G8 solutions were loaded into mixer nozzles (McMaster-Carr, GA) and extruded into PDMS molds with an inner diameter of 7.5 mm and a height of 15 mm which were 3D printed using an INKREDIBLE bioprinter (Cellink, Sweden).

**Video S2: Compression testing of samples made of different OAlg and Gel-CDH combinations.** Video shows the mechanical properties of composite hydrogels which were determined at room temperature using a compression tester (Instron 5966, Instron, MA) equipped with a 1-kN load-cell at a compression speed of 50 mm/min. The specimens were compressed to 30% strain. Young's modulus was calculated from the stress-strain curve. Five samples (n=5) were used for each group.

**Video S3: Crosslinking of OAlg and Gel-CDH via Schiff's base reaction.** OAlg and Gel-CDH were crosslinked via Schiff base reaction to form the imine bond between aldehyde groups of OAlg and amino groups of Gel-CDH.

**Video S4: 3D Bioprinting of a meshed tube construct with preheated Gel-CDH Ink and slurry bath consisting of OAlg and crosslinked gelation microparticles.** Gel-CDH was preheated to 37 °C and extruded into the slurry bath composed of gelatin microparticles and OAlg solution. Gel-CDH and OAlg were then rapidly crosslinked to form filaments.

**Video S5: A 3D bioprinted meshed tube construct removed from the slurry bath.** Meshed tube construct maintained its structural integrity without any collapse or filament decomposition after pipetting of PBS indicating the remarkable mechanical stability of the printed constructs.

**Video S6: A 3D bioprinted "ball-in-a-cage" construct removed from the slurry bath.** "ball-in-a-cage" construct was 3D printed, and the ball (red color) was trapped and able to freely rotate within the enclosing mesh cage (green color).
